# Supplementary material
Source: PubMed Central journal article supplement (PMC6689311)

1 **SUPPLEMENTAL MATERIAL**

2 **Fig. S1. Induction of YshB has no effect in *S. Typhimurium* growth, motility or adherence**

3 **to host cells.** (A) Growth rate of wild type and YshB induced *Salmonella* strains in LB medium.

4 (B) Swarming assay to detect motility rates of *Salmonella* strains with induced YshB in LB with

5 0.25% agar. Images were taken 7 hours post inoculation. (C) Quantitative representation of the

6 motility rates between wild type and YshB induced strains as shown by diameter of the halo

7 around the spot of inoculation with time. (D) Adherence assay to assess the role of YshB in

8 bacterial attachment to host cells, ns: not significant. Error bars indicate the standard deviation

9 from mean of three independent experiments.

10 **Fig. S2. YshB is not a translocated effector.** A  $\beta$ -lactamase translocation assay was

11 conducted by using a plasmid construct in which *sipA* from pM1644 was replaced with *yshB*

12 (*pyshB-TEM1*). Wild type *Salmonella* with pM1644 and plasmid pZP2277 were used as positive

13 and negative controls respectively.

14 **Table. S1. Primers used in this study.**

15 **Table. S2. Plasmids used in this study.**

Fig. S1

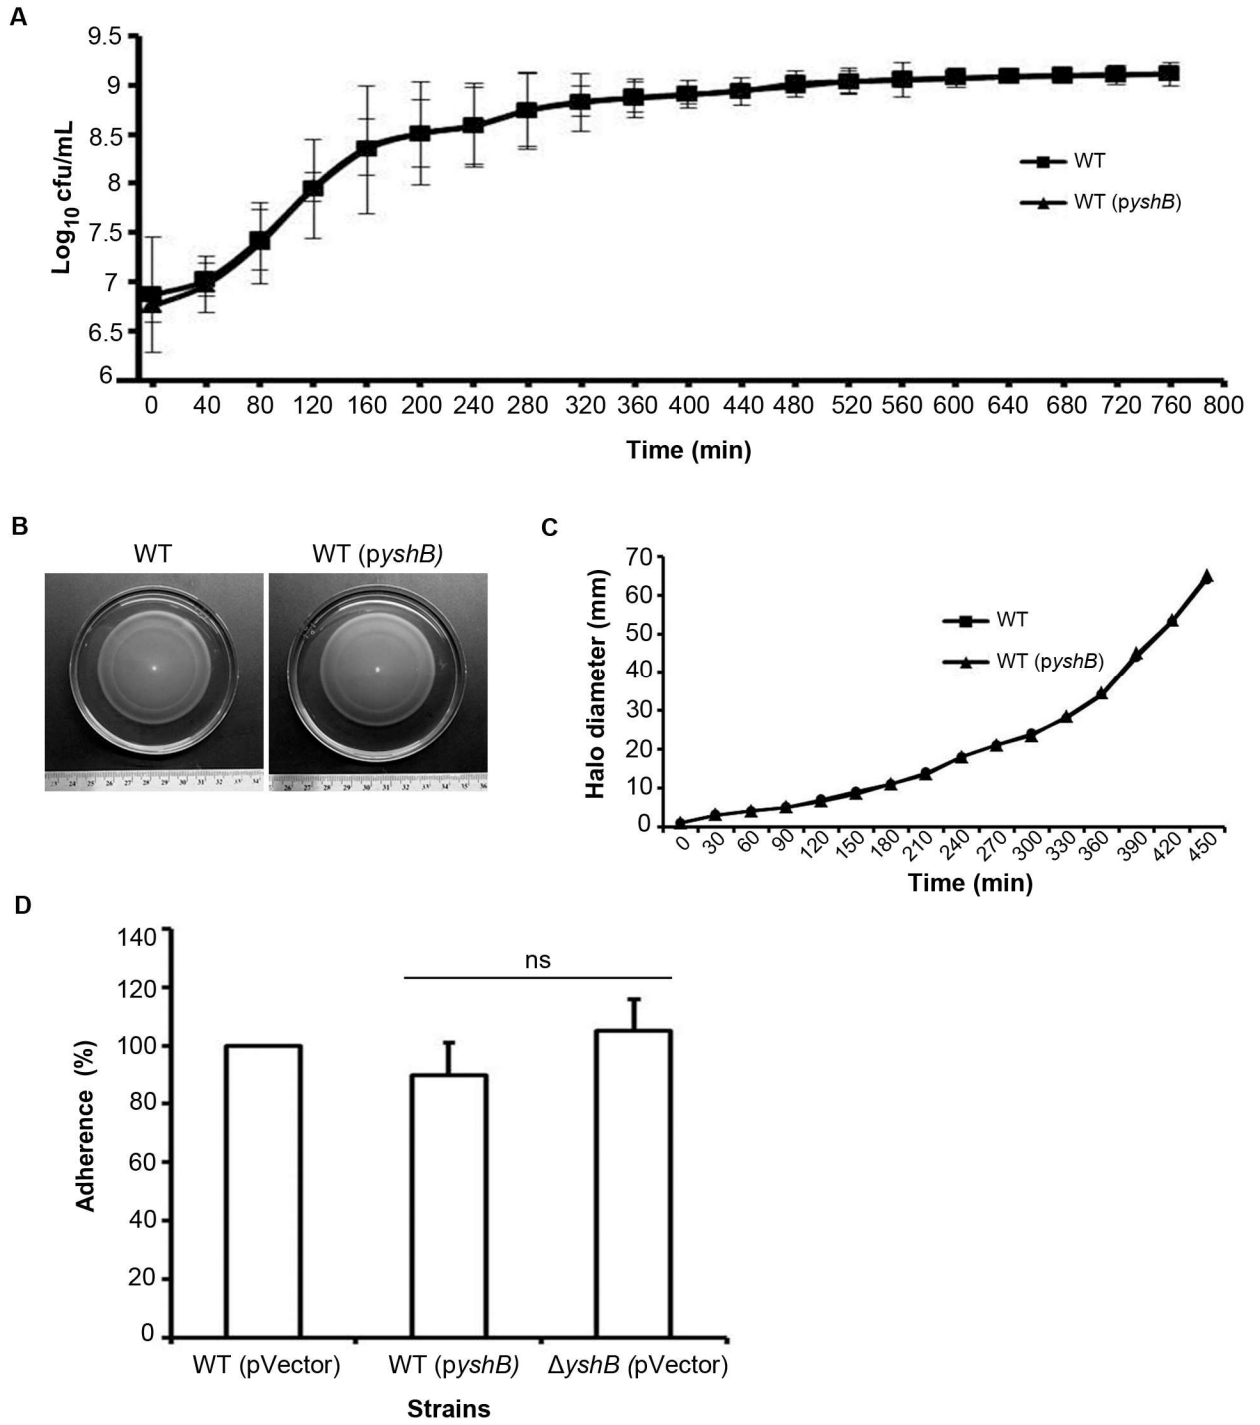

Fig. S2

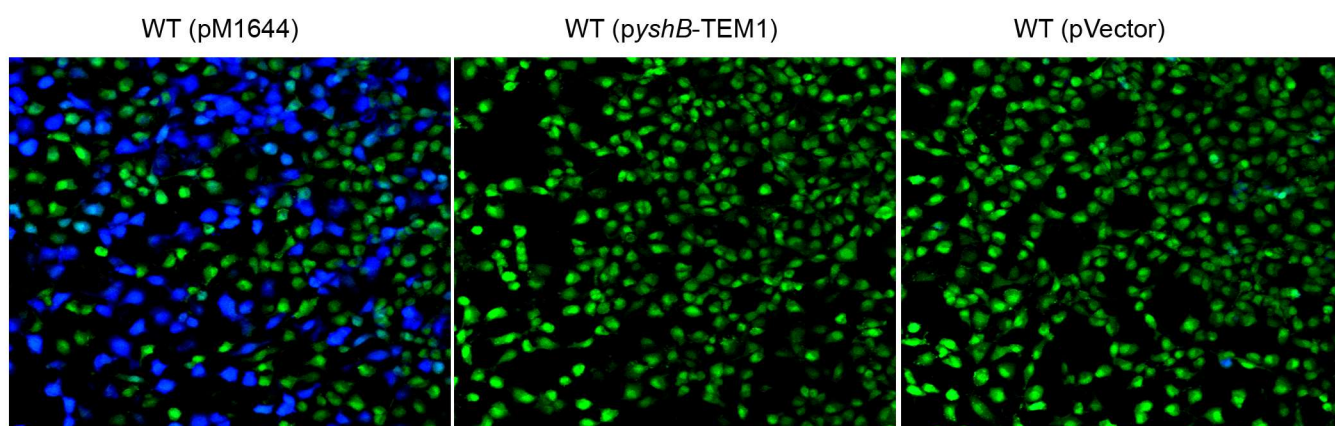

Supplement: JB.00314-19-s0003.pdf [file JB.00314-19-s0003.pdf]
